# Supplementary material
Source: PubMed Central journal article supplement (PMC4942841)
Supplement: NIHMS793398-supplement-Supplemental_Report.pdf [file NIHMS793398-supplement-Supplemental_Report.pdf]

# Pre-infusion versus Post Infusion Integration Site Clumps in WAS Patients

November 25, 2014

## Contents

|           |                                                               |           |
|-----------|---------------------------------------------------------------|-----------|
| <b>1</b>  | <b>Introduction</b>                                           | <b>1</b>  |
| <b>2</b>  | <b>The Data</b>                                               | <b>3</b>  |
| <b>3</b>  | <b>Dereplication</b>                                          | <b>4</b>  |
| <b>4</b>  | <b>Patient Specific Clustering of Sites</b>                   | <b>5</b>  |
| <b>5</b>  | <b>Clumps in Individual Patients</b>                          | <b>6</b>  |
| <b>6</b>  | <b>All Patients</b>                                           | <b>8</b>  |
| <b>7</b>  | <b>Gene Annotations</b>                                       | <b>9</b>  |
| 7.1       | Individual Patients . . . . .                                 | 9         |
| 7.2       | All Patients . . . . .                                        | 11        |
| <b>8</b>  | <b>Comparison to WAS <math>\gamma</math>-Retroviral Trial</b> | <b>12</b> |
| <b>9</b>  | <b>Software Used</b>                                          | <b>19</b> |
|           | <b>References</b>                                             | <b>21</b> |
| <b>10</b> | <b>Appendix - R code</b>                                      | <b>21</b> |

## 1 Introduction

This report investigates the clustering or *clumping* of integration site distributions in cell samples from gene-corrected WAS patients. The study in-

cluded only six patients, so definitive conclusions about safety await future studies with greater power.

Adverse events have taken place in gene therapy trials with early stage gammaretroviral vectors that involved insertional activation of cancer-related genes. Leukemias developed after reinfusion of gene-corrected cells, and analysis of the transformed cells showed that vector DNA had integrated near the transcription start sites of gene such as LMO2, CCND2, and MECOM/EVI1. These observations and others support the idea that insertional activation of these genes contributed *hits* toward transformation.

In addition, analysis of populations of integration sites in samples from these trials showed that many integration sites could be found near the transcription start sites of LMO2, CCND2, MECOM/EVI1 and other genes of concern even in non-transformed cells. These findings supported the idea that after transplantation, cells with integration sites in these loci proliferated or survived preferentially. Supporting this idea, repeating one of these trials with a vector with reduced potential for insertional activation resulted in no detection of such clumps ([Hacein-Bey-Abina et al., 2014]). A previous trial to treat WAS using an early-version gammaretroviral vector with high potential for insertional activation resulted in detection of integration site clumps associated with LMO2, CCND2, MECOM/EVI1, and other genes of concern ([Braun et al., 2014]). Integration sites from many of the patients were found in each of these clumps.

Thus, as a surrogate for safety in the WAS lentivirus trial reported here, we investigated clumping of integration sites in patient samples using scan statistics ([Berry et al., 2014]). In one approach, we compared distributions of integration sites in each subject pre-transplantation and post-transplantation. We sought to determine whether preferential outgrowth was detectable associated with integration near LMO2, CCND2, MECOM/EVI1, or other genes of concern.

Comparing over clumps seen in all patients, clumps were found near cancer-related genes no more frequently than expected by chance. A handful of patient-specific clumps could be detected, and some of these were near cancer-related genes (broadly defined), but none were near LMO2, CCND2, MECOM/EVI1 or other genes implicated in adverse events in human gene therapy.

In another approach, we compared integration site clumps from the WAS-lentiviral vector trial reported here to integration site clumps from the Braun et al. trial using a WAS gammaretroviral vector, in which more than half of the subjects experienced adverse events. A total of 280 clumps were detected at the cut value studied, of which 230 were specific to the WAS-

gammaretroviral vector trial. Among these were clumps at LMO2, CCND2, and MECOM/EVI1 — genes that were involved in adverse events in the WAS-gammaretroviral vector study. (That a large number of clumps was discovered is unsurprising given that different methods of recovering integration sites were used and this can generate differences in recovery rates that generate clumps as was shown in [Berry et al., 2014], for example.) Thus we infer that the pattern of integration site clumping seen in the WAS-lentiviral vector trial is consistent with improved safety.

A technical account of the statistical analysis is presented below.

## 2 The Data

This section covers details of data processing used specifically for this report. These data were provided by Nirav Malani of the Bushman Lab at UPenn to Charles Berry who performed the processing for this document. This report uses the data to look for differences between the pre-infusion and post-infusion distributions of integration sites.

The R code used appears in the appendix. We start by loading the `GRanges` object prepared by Nirav Malani and adding `hg18` metadata. As a prelim, the `GenomicRanges` [Lawrence et al., 2013] and `geneRxCluster` [Berry et al., 2014] R packages [R Core Team, 2013] are loaded. Then the actual `GRanges` object that gives the integration sites is loaded. Also, information about the chromosomes in the `hg18` freeze is added.

```
## [1] "data/was.gr.RData"  
## [1] "was.gr"
```

The integration sites that are unique to the patient and infusion are identified, the `start` of sites on the + strand are moved to match the site of attack with the lower position number, and then all sites are ordered by position on each chromosome.

The numbers of pre and post infusion sites per patient are reported here — starting by checking the potential mismappings by comparing the `start` of adjacent sites according to strand.

And now here is the table of the successive differences. An excess of ++ and -- compared to +- and -+ suggests mismapping for small differences in the successive positions (`start`). As seen here a difference of '1' shows such an effect, therefore these will be deleted before proceeding.

```
##
##      ++   +-   -+   --
##  0      0   21   16   0
##  1    266   2   21   44
##  2      2    0    4    0
##  3      1    2    2    2
##  4      0    3    1    2
##  5      1    0    3    0
##  6     29    1    1   36
##  7      9    0    1   13
##  8      8    0    1    5
##  9      7    3    1    4
## 10 20263 20124 20097 19854
```

### 3 Dereplication

Dereplication rids extraneous positions whose mismapping may result in counting a single integration site as multiple sites. The code is a bit tortuous. In the end it finds a logical vector of sites to be dropped as misplaced duplicates. It uses the clonecount to make this decision as to which of several competing positions to use with a random tiebreaker if necessary.

And here is the table of patients by pre/post-infusion.

```
##
##      post  pre
##  Pt1  1633  5250
##  Pt2  7341 17356
##  Pt3  1452  1026
##  Pt4 11854  2481
##  Pt5  2256   176
##  Pt6   822 29221
```

This table guides some choices in the analysis. Since there are several patients with many fewer sites in either the pre or post phase, filtering the marginal counts for single patients could be troublesome. Also, the imbalances could contribute to artifactual findings in the form of Simpson’s paradox if data from all patients are combined. However, single patient analyses have many fewer sites and might yield low power compared to when all

sites are used. As a consequence, both single patient analysis and combined patient analysis will be performed.

## 4 Patient Specific Clustering of Sites

By tabling the successive patient identities of adjacent sites, one gets a quick indication of whether there is patient specific clustering of pre-infusion versus post-infusion integration sites. Here is the table (rows refer to the site at the lesser position, columns to the greater).

```
##
##      Pt1 Pt2 Pt3 Pt4 Pt5 Pt6
## Pt1  664 2040 237 1170 201 2567
## Pt2 2031 7891 768 4325 734 8936
## Pt3  232  761  85  462  68  868
## Pt4 1247 4305 441 2968 510 4858
## Pt5  223  776  74  491 104  764
## Pt6 2484 8914 869 4911 813 12038
```

Here are the fitted values under the assumption of no patient clustering:

```
##
##      Pt1 Pt2 Pt3 Pt4 Pt5 Pt6
## Pt1 585.6 2101.0 210.5 1219.3 206.8 2555.8
## Pt2 2101.4 7539.3 755.5 4375.4 742.1 9171.3
## Pt3 210.8 756.2 75.8 438.9 74.4 919.9
## Pt4 1219.8 4376.3 438.6 2539.8 430.8 5323.7
## Pt5 207.0 742.8 74.4 431.1 73.1 903.6
## Pt6 2556.3 9171.4 919.1 5322.6 902.8 11156.8
```

And here are the differences of observed and expected values:

```
##
##      Pt1 Pt2 Pt3 Pt4 Pt5 Pt6
## Pt1 78.4 -61.0 26.5 -49.3 -5.8 11.2
## Pt2 -70.4 351.7 12.5 -50.4 -8.1 -235.3
## Pt3 21.2 4.8 9.2 23.1 -6.4 -51.9
## Pt4 27.2 -71.3 2.4 428.2 79.2 -465.7
## Pt5 16.0 33.2 -0.4 59.9 30.9 -139.6
## Pt6 -72.3 -257.4 -50.1 -411.6 -89.8 881.2
```

Notice that the diagonal is positive — more observed than expected in the same patient — and the off diagonal elements are mostly negative. And for completeness the  $X^2$  test:

```
##  
## Pearson's Chi-squared test  
##  
## data:  pp.tab  
## X-squared = 348.7741, df = 25, p-value < 2.2e-16
```

Given this, it seems best to account for patient effects in any assessment of clumping of sites in which the sites from multiple patients are studied. A permutation tests in which the pre-post identities of sites for each patient are permuted en bloc.

## 5 Clumps in Individual Patients

For each patient, the `gRxCluster` function is applied with no filtering for low density of sites. The default criterion for the target number of false discoveries is adjusted to 5/6 (versus the default of 5) so that when the defaults are added over all six patients, they sum to 5.

Here is the summary of the discoveries for each patient. As can be seen all the clumps discovered for 5 of the six patients are at an FDR of 0.10 or less.

```
##      Clusters_Discovered  FDR  
## Pt1                      9 0.06  
## Pt2                     52 0.02  
## Pt3                      6 0.11  
## Pt4                      8 0.05  
## Pt5                      0 0.34  
## Pt6                      4 0.05
```

Clumps could be idiosyncratically associated with just one patient or seen in multiple patients. Here the overlapping clumps are joined together.

The next table shows how many patients have clumps that overlap those of other patients. The '1' means only one clump shares the region (with itself), '2' means two clumps share a region, et cetera.

```
##
## 1 2 3 5
## 39 8 4 1
```

There are quite a few clumps that seem to be idiosyncratic, none shared by all patients, and only one clump shared by 5 of the 6 patients. However, maybe a clump discovered in one patient exists in another, but the signal is not strong enough to warrant 'discovery'. The following code sets the stage for exploring correlation of clump signals between patients.

First, the count of clumps favoring pre-infusion sites is compared to the count favoring post-infusion sites.

```
##      POST
## PRE  0  1  2  3  5
##    0  0 22  6  4  1
##    1 17  0  0  0  0
##    2  2  0  0  0  0
```

It looks like when clumps are discovered in different patients at the same genomic location they tend to agree as to whether pre or post infusion sites are favored. Here are the clumps that are discovered in two or more patients.

Here a code of **PRE** or **POST** identifies discovered clumps while **pre** or **post** indicates which time is favored for the sites in a region discovered in other patients but not the patient listed in the column heading. As can be seen, even when no clump is discovered in a patient, the direction favored usually agrees with the direction in patients in which clumps were discovered.

```
##      Pt1 Pt2 Pt3 Pt4 Pt5 Pt6
## 4  POST POST post post post post
## 7  POST POST POST POST post POST
## 12 POST POST pre POST post post
## 20 POST POST POST post pre post
## 21 post POST POST post post post
## 24 POST POST POST post post post
## 25 post POST post post post POST
## 26 post POST post post pre POST
## 34 post post POST POST post post
## 39 pre PRE post PRE pre pre
## 40 pre PRE pre PRE pre pre
## 42 POST POST pre POST post post
```

```
## 51 post POST POST post post post
```

```
##      chromo      start      end      width
## 4      chr1 152697830 155022997 2325168
## 7      chr11 64721170 71336379 6615210
## 12     chr12 48101903 54594114 6492212
## 20     chr17 32393122 45086180 12693059
## 21     chr17 70859851 74367028 3507178
## 24     chr19 7681725 18287070 10605346
## 25     chr19 43133759 51508964 8375206
## 26     chr19 53620448 54764090 1143643
## 34     chr3 49090753 52690505 3599753
## 39     chr4 99533135 110213671 10680537
## 40     chr5 89268705 98267507 8998803
## 42     chr6 32269912 36508667 4238756
## 51     chr9 127473502 131821313 4347812
```

## 6 All Patients

In this section, sites for all patients are combined and subjected to discovery by `gRxCluster`. A set of permutations is developed. The permutations are used to find the false discovery rate.

Here are the sites discovered at an FDR of less than 0.15. The column labelled 'value1' counts the number of pre-infusion sites, while that labelled 'value2' counts the post-infusion sites. The 'FDR' column is the false discovery rate estimated by permuting the pre-post condition labels in each patient as a block.

|     | chromo | start     | end       | width   | value1 | value2 | FDR  |
|-----|--------|-----------|-----------|---------|--------|--------|------|
| 17  | chr1   | 153908358 | 154451388 | 543031  | 43     | 80     | 0.12 |
| 26  | chr11  | 64806544  | 65110410  | 303867  | 41     | 108    | 0.07 |
| 56  | chr14  | 105563367 | 106348468 | 785102  | 46     | 88     | 0.12 |
| 81  | chr17  | 37409347  | 38585509  | 1176163 | 86     | 142    | 0.12 |
| 90  | chr17  | 71474109  | 75578416  | 4104308 | 233    | 332    | 0.12 |
| 97  | chr19  | 2245314   | 3147284   | 901971  | 51     | 83     | 0.12 |
| 100 | chr19  | 10280360  | 11286268  | 1005909 | 70     | 113    | 0.12 |
| 104 | chr19  | 14111371  | 15238855  | 1127485 | 42     | 88     | 0.12 |
| 106 | chr19  | 17292023  | 18242345  | 950323  | 26     | 95     | 0.09 |
| 113 | chr19  | 53582121  | 54767807  | 1185687 | 82     | 164    | 0.03 |

Table 1: Clumps Discovered Using All Patients.

Here is the number of such sites that overlap with the clumps discovered in two or more individual patients or not.

```
##
##      Over Not Over
##      8      2
```

Here is the number of regions with clumps discovered in 2 or more patients that overlie (or not) a clump discovered when all sites are used.

```
##
##      Over Not Over
##      6      7
```

## 7 Gene Annotations

Now look at how the clumps discovered relate to gene annotations. First, some gene annotations are read in for the bodies and edges of Lymphoma associated genes (`LymBody`, `LymEdge`) and for the bodies and edges of a list of Cancer associated genes (`AllBody`, `AllEdge`).

### 7.1 Individual Patients

A table is prepared showing the number of clumps that overlie one or more genes according to each of four annotations. Here the clumps discovered in each patient that also occur in at least one other patient are studied. The table below shows the number of clumps that overlie one or more genes.

```
##      LymBody LymEdge AllBody AllEdge
## Pt1         2         2         6         6
## Pt2         1         2        18        18
## Pt3         2         2         6         6
## Pt4         0         0         6         6
## Pt5         0         0         0         0
## Pt6         0         0         4         4
```

So, most patients have clumps that are shared with others and that overlie one or more genes. To see if this is remarkable, 50 permutations of the pre-post infusion indicator are performed. For each patient, the clumps are discovered in the same manner as before, and the clumps it shares with

others are screened to see if any genes lie within the region of the clump. A  $\chi^2$  goodness-of-fit tests is performed, taking the mean number of clumps overlying genes as the expected value.

First the permutations are performed and the jointly discovered clumps are noted. Now the results are rendered as tables like that above for each permutation. Now the tables are used to find expected values and  $\chi^2$  statistics. The p-values are subjected to Holm adjustment for multiple comparisons.

| ## | Var2 |         |         |         |         |
|----|------|---------|---------|---------|---------|
| ## | Var1 | LymBody | LymEdge | AllBody | AllEdge |
| ## | Pt1  | 0.64    | 0.64    | <0.01   | <0.01   |
| ## | Pt2  | 1       | 0.64    | <0.01   | <0.01   |
| ## | Pt3  | 0.64    | 0.64    | <0.01   | <0.01   |
| ## | Pt4  | 1       | 1       | <0.01   | <0.01   |
| ## | Pt5  | 1       | 1       | 1       | 1       |
| ## | Pt6  | 1       | 1       | <0.01   | <0.01   |

As can be seen, most patients have more clumps overlying All cancer genes or bodies than expected. To determine the degree to which these clumps favor the pre or post infusion sample and whether the number of such sites is enough to raise concern, some further tables were created. For each patient the clumps seen in at least one other patient were studied. The logarithm of the odds ratio ( $\log. OR$ ) for the number of sites in the clump (versus elsewhere) comparing the post to the pre infusion samples was computed. Also the expected numbers of sites given the width of the clump and the overall numbers of sites pre and post infusion were computed and the ratios of observed to expected ( $pre.OE$ ,  $post.OE$ ) computed. It should be noted that it is expected that the observed/expected ratios will typically be greater than 1.0, since retroviral vectors have fairly strong preferences for sites of integration, i.e most sites are in regions of higher than average density. Here are the tables:

| chromo | start     | end       | log.OR | pre.OE | post.OE | LymBody | LymEdge | AllBody | AllEdge |
|--------|-----------|-----------|--------|--------|---------|---------|---------|---------|---------|
| chr1   | 152697830 | 154439441 | 1.56   | 3.39   | 16.36   | 0       | 0       | 5       | 10      |
| chr11  | 64721170  | 66729654  | 1.12   | 10.30  | 31.21   | 0       | 0       | 11      | 22      |
| chr12  | 48101903  | 54594114  | 1.44   | 1.82   | 7.61    | 0       | 0       | 12      | 25      |
| chr17  | 32393122  | 45086180  | 1.29   | 2.37   | 8.38    | 0       | 0       | 37      | 72      |
| chr19  | 7681725   | 18287070  | 1.26   | 3.57   | 12.18   | 2       | 4       | 31      | 62      |
| chr6   | 32270883  | 36508667  | 1.29   | 3.35   | 12.10   | 1       | 2       | 11      | 23      |

Table 2: Pt1

| chromo | start     | end       | log.OR | pre.OE | post.OE | LymBody | LymEdge | AllBody | AllEdge |
|--------|-----------|-----------|--------|--------|---------|---------|---------|---------|---------|
| chr1   | 153908358 | 155022997 | 1.44   | 3.21   | 13.65   | 0       | 0       | 4       | 8       |
| chr11  | 64967955  | 65153744  | 2.27   | 4.81   | 50.04   | 0       | 0       | 3       | 9       |
| chr11  | 66667440  | 67615444  | 1.57   | 5.09   | 24.52   | 0       | 0       | 4       | 7       |
| chr12  | 48381634  | 49336955  | 1.79   | 1.87   | 11.50   | 0       | 0       | 1       | 1       |
| chr12  | 52279780  | 54443377  | 1.32   | 1.65   | 6.25    | 0       | 0       | 4       | 7       |
| chr17  | 32571350  | 39895318  | 1.27   | 2.12   | 7.50    | 0       | 0       | 25      | 50      |
| chr17  | 43486382  | 45037513  | 1.77   | 1.27   | 7.63    | 0       | 0       | 6       | 11      |
| chr17  | 71306851  | 73581972  | 1.26   | 5.18   | 18.20   | 0       | 0       | 4       | 9       |
| chr19  | 10697020  | 12448582  | 1.73   | 1.94   | 11.10   | 0       | 0       | 3       | 6       |
| chr19  | 13079099  | 15086486  | 1.32   | 2.76   | 10.31   | 0       | 1       | 3       | 8       |
| chr19  | 17114448  | 18073086  | 1.81   | 2.05   | 12.78   | 0       | 0       | 4       | 8       |
| chr19  | 43133759  | 51508964  | 1.26   | 1.56   | 5.45    | 0       | 0       | 23      | 46      |
| chr19  | 53620448  | 54764090  | 1.64   | 4.06   | 21.06   | 0       | 0       | 3       | 5       |
| chr4   | 99533135  | 108052803 | -2.19  | 1.53   | 0.15    | 1       | 1       | 5       | 9       |
| chr5   | 89268705  | 94895250  | -3.56  | 1.30   | 0.00    | 0       | 0       | 1       | 2       |
| chr6   | 32269912  | 32885356  | 1.47   | 4.36   | 19.23   | 0       | 0       | 1       | 6       |
| chr6   | 33497458  | 34724059  | 1.61   | 1.75   | 8.96    | 0       | 0       | 2       | 4       |
| chr9   | 127655338 | 130377171 | 1.43   | 1.77   | 7.45    | 0       | 0       | 2       | 2       |

Table 3: Pt2

| chromo | start     | end       | log.OR | pre.OE | post.OE | LymBody | LymEdge | AllBody | AllEdge |
|--------|-----------|-----------|--------|--------|---------|---------|---------|---------|---------|
| chr11  | 66286871  | 71336379  | 2.23   | 0.60   | 8.04    | 1       | 2       | 11      | 22      |
| chr17  | 35218090  | 41595694  | 1.95   | 0.95   | 8.04    | 0       | 0       | 22      | 43      |
| chr17  | 70859851  | 74367028  | 1.53   | 2.59   | 13.40   | 0       | 0       | 9       | 16      |
| chr19  | 11096147  | 15314600  | 2.12   | 0.72   | 8.61    | 1       | 2       | 12      | 24      |
| chr3   | 49324552  | 52690505  | 1.72   | 1.80   | 12.06   | 0       | 0       | 21      | 40      |
| chr9   | 127473502 | 131821313 | 3.28   | 0.00   | 8.84    | 0       | 0       | 6       | 11      |

Table 4: Pt3

| chromo | start     | end       | log.OR | pre.OE | post.OE | LymBody | LymEdge | AllBody | AllEdge |
|--------|-----------|-----------|--------|--------|---------|---------|---------|---------|---------|
| chr11  | 64900799  | 65197021  | 3.08   | 0.00   | 45.05   | 0       | 0       | 6       | 13      |
| chr12  | 49767843  | 53709174  | 3.08   | 0.00   | 3.39    | 0       | 0       | 9       | 18      |
| chr3   | 49090753  | 49982312  | 3.17   | 0.00   | 16.44   | 0       | 0       | 8       | 16      |
| chr4   | 106050211 | 110213671 | -2.31  | 3.30   | 0.31    | 0       | 0       | 2       | 4       |
| chr5   | 93302482  | 98267507  | -1.99  | 2.77   | 0.37    | 0       | 0       | 1       | 2       |
| chr6   | 34411534  | 36467219  | 3.33   | 0.00   | 8.40    | 0       | 0       | 4       | 8       |

Table 5: Pt4

| chromo | start    | end      | log.OR | pre.OE | post.OE | LymBody | LymEdge | AllBody | AllEdge |
|--------|----------|----------|--------|--------|---------|---------|---------|---------|---------|
| chr11  | 64963436 | 65194518 | 3.04   | 6.43   | 130.65  | 0       | 0       | 5       | 12      |
| chr11  | 65678181 | 66166500 | 2.67   | 3.91   | 54.10   | 0       | 0       | 2       | 4       |
| chr19  | 46741596 | 47245026 | 2.65   | 4.43   | 59.97   | 0       | 0       | 2       | 5       |
| chr19  | 53970263 | 54759514 | 2.35   | 5.25   | 52.60   | 0       | 0       | 2       | 4       |

Table 6: Pt6

## 7.2 All Patients

Now the results for clumps derived from all patients combined are considered. Here the clumps that achieved an  $FDR < 0.15$  are examined and the number of genes that they overlies is noted. Again counts of genes overlapped by each clump, the log odds ratio, and the ratios of observed to expected sites are presented.

|     | LymBody | LymEdge | AllBody | AllEdge | log.OR | pre.OE | post.OE |
|-----|---------|---------|---------|---------|--------|--------|---------|
| 17  | 0       | 0       | 1       | 2       | 1.40   | 4.43   | 18.02   |
| 26  | 0       | 0       | 4       | 8       | 1.75   | 7.54   | 43.48   |
| 56  | 0       | 0       | 0       | 0       | 1.43   | 3.27   | 13.71   |
| 81  | 0       | 0       | 6       | 11      | 1.29   | 4.09   | 14.77   |
| 90  | 0       | 0       | 10      | 20      | 1.15   | 3.17   | 9.90    |
| 97  | 0       | 0       | 3       | 6       | 1.27   | 3.16   | 11.26   |
| 100 | 0       | 0       | 4       | 10      | 1.26   | 3.89   | 13.74   |
| 104 | 0       | 0       | 4       | 7       | 1.52   | 2.08   | 9.55    |
| 106 | 0       | 1       | 4       | 9       | 2.07   | 1.53   | 12.23   |
| 113 | 0       | 0       | 3       | 6       | 1.48   | 3.86   | 16.92   |

Table 7: Gene Overlaps for Clumps Discovered Using All Patients

To get an idea if these should be given weight, the p-values determined by permutation are given here. There is one p-value for each gene annotation class. These are subjected to the Holm adjustment for multiple comparisons.

```
## LymBody LymEdge AllBody AllEdge
## 1.000 0.250 0.125 0.125
```

## 8 Comparison to WAS $\gamma$ -Retroviral Trial

The authors of a recent paper on gene therapy for Wiskott-Aldrich Syndrome using a  $\gamma$ -retroviral vector ([Braun et al., 2014]) have graciously shared their data, thus allowing a direct comparison of the distribution of integration sites from these two trials. The Braun et al. data were lifted over to the hg18 freeze to enforce comparability with our data.

Before comparing our post-infusion data to their data, we performed curation analogous to that performed on the present data to eliminate duplicate copies of the same integration site in a single patient. This is necessary, because the same site can appear in different samples from the same patient, and because variations in the reported sequence for different reads on the same integration site can result in the position being mapped in multiple adjacent or nearby positions. The following table demonstrates the situation before such curation. The table examines the distances between adjacent, unique positions of integration sites (allowing duplicates if they arise from different patients). It also determines the orientation of the integration site — reporting ‘+ +’ if both sites in an adjacent pair lie on the ‘+’ strand, ‘+ -’ if the first lies on the ‘+’ strand and the second lies on the ‘-’ strand, and so on. The rows report the distances between adjacent pairs (with ‘20’ referring to twenty or more), while the columns report the orientations.

| ## |    | + +   | + -   | - +   | - -   |
|----|----|-------|-------|-------|-------|
| ## | 0  | 0     | 350   | 420   | 0     |
| ## | 1  | 1642  | 217   | 195   | 1713  |
| ## | 2  | 930   | 158   | 161   | 956   |
| ## | 3  | 4298  | 434   | 282   | 4254  |
| ## | 4  | 1141  | 220   | 196   | 1157  |
| ## | 5  | 114   | 122   | 159   | 137   |
| ## | 6  | 210   | 164   | 178   | 194   |
| ## | 7  | 201   | 165   | 162   | 207   |
| ## | 8  | 188   | 145   | 126   | 167   |
| ## | 9  | 176   | 142   | 143   | 154   |
| ## | 10 | 193   | 169   | 153   | 190   |
| ## | 11 | 162   | 149   | 138   | 154   |
| ## | 12 | 142   | 112   | 140   | 171   |
| ## | 13 | 156   | 142   | 117   | 152   |
| ## | 14 | 150   | 129   | 106   | 127   |
| ## | 15 | 156   | 137   | 104   | 139   |
| ## | 16 | 148   | 126   | 130   | 141   |
| ## | 17 | 129   | 132   | 117   | 105   |
| ## | 18 | 135   | 125   | 117   | 135   |
| ## | 19 | 127   | 126   | 141   | 136   |
| ## | 20 | 37273 | 35431 | 35607 | 36837 |

As is evident, there are many more pairs with both sites lying in the same orientation at a distance of 1 to 5 than pairs with the sites in opposite orientations. There are no pairs of sites in the same orientation at the same position, because at most one position per patient in each orientation was used by us and because the data we received had evidently been filtered to remove instances in which the same position and orientation appeared in more than one patient.

The data were filtered by performing hierarchical clustering on the positions in each patient and orientation, cutting the tree at a height of 5 (joining positions differing by no more than 5 as a cluster), determining the dominant position in each cluster according to read count, and then filtering out all but the one dominant position. After filtering, the sites were combined with the current post-infusion data (WAS-lenti). Here are the integration site numbers:

```
## trial
##      Braun WAS-lenti
##      156488      25358
```

The resulting dataset was compared to current post-infusion data (WAS-lenti) using the function `gRxCluster` using between 75 and 120 sites as the window width and filtering out windows spanning more than the tenth percentile of width for the number of sites they contain. Patient-wise permutation was used to establish False Discovery Rates for the discovered clumps.

A total of 280 clumps were discovered at an estimated FDR of 0.098. Of these 230 clumps were enriched for sites from the Braun trial, while 50 clumps were enriched for post-infusion sites from the current trial(WAS-lenti). The following table shows them all. In comparing the numbers of integration sites, recall that the ratio of sites is  $\frac{\text{Braun sites}}{\text{Was-lenti sites}} = \frac{156488}{25358} = 6.17$

The FDR shown in the rightmost column is for the clump in that row and all clumps discovered at the same (or lesser) target for false discovery as the clump of that row.

Note that the clump at `chr11:33,560,205-33,935,491` overlaps LMO2, the clump at `chr12:3,848,551-4,270,056` overlaps CCND2, and the clump at `chr3:170,336,316-171,166,914` overlaps MECOM/EVI1. The rows for these clumps are highlighted in the table.

|    | chromo | start     | end       | width  | Braun | WAS-Lenti | FDR  |
|----|--------|-----------|-----------|--------|-------|-----------|------|
| 1  | chr1   | 2731220   | 3274223   | 543004 | 400   | 2         | 0.05 |
| 2  | chr1   | 8398200   | 8676506   | 278307 | 81    | 43        | 0.05 |
| 3  | chr1   | 9047419   | 9076498   | 29080  | 96    | 1         | 0.06 |
| 4  | chr1   | 16023117  | 16150731  | 127615 | 53    | 31        | 0.05 |
| 5  | chr1   | 20995515  | 21353314  | 357800 | 116   | 77        | 0.05 |
| 6  | chr1   | 26733475  | 26986899  | 253425 | 78    | 31        | 0.08 |
| 7  | chr1   | 27552886  | 27777034  | 224149 | 65    | 35        | 0.05 |
| 8  | chr1   | 28540944  | 28640264  | 99321  | 35    | 28        | 0.05 |
| 9  | chr1   | 65051397  | 65471523  | 420127 | 148   | 0         | 0.05 |
| 10 | chr1   | 92610151  | 92706447  | 96297  | 92    | 0         | 0.05 |
| 11 | chr1   | 101327734 | 101549911 | 222178 | 112   | 0         | 0.05 |
| 12 | chr1   | 108222206 | 108508897 | 286692 | 113   | 3         | 0.08 |
| 13 | chr1   | 120336975 | 120364049 | 27075  | 168   | 0         | 0.05 |
| 14 | chr1   | 143970125 | 143997243 | 27119  | 155   | 2         | 0.05 |
| 15 | chr1   | 148721739 | 148864250 | 142512 | 98    | 0         | 0.05 |
| 16 | chr1   | 196792190 | 196931384 | 139195 | 99    | 2         | 0.08 |
| 17 | chr1   | 198386339 | 198594639 | 208301 | 126   | 2         | 0.06 |
| 18 | chr1   | 205969263 | 206178826 | 209564 | 133   | 0         | 0.05 |
| 19 | chr1   | 228348187 | 228493867 | 145681 | 83    | 0         | 0.06 |
| 20 | chr1   | 232675869 | 233225687 | 549819 | 276   | 3         | 0.05 |
| 21 | chr1   | 237633541 | 237821037 | 187497 | 92    | 1         | 0.06 |
| 22 | chr2   | 8284001   | 8738746   | 454746 | 220   | 0         | 0.05 |
| 23 | chr2   | 16283870  | 16535509  | 251640 | 196   | 4         | 0.05 |
| 24 | chr2   | 37870285  | 38211261  | 340977 | 146   | 0         | 0.05 |
| 25 | chr2   | 42973286  | 43060492  | 87207  | 135   | 2         | 0.06 |

|    |      |           |           |        |      |    |      |
|----|------|-----------|-----------|--------|------|----|------|
| 26 | chr2 | 45915040  | 46046848  | 131809 | 84   | 1  | 0.08 |
| 27 | chr2 | 58651594  | 58704402  | 52809  | 80   | 1  | 0.09 |
| 28 | chr2 | 58788098  | 58991567  | 203470 | 140  | 0  | 0.05 |
| 29 | chr2 | 62381081  | 62589100  | 208020 | 101  | 2  | 0.07 |
| 30 | chr2 | 66502728  | 66764946  | 262219 | 249  | 4  | 0.05 |
| 31 | chr2 | 68801388  | 68835242  | 33855  | 91   | 0  | 0.05 |
| 32 | chr2 | 69974031  | 70272277  | 298247 | 143  | 2  | 0.06 |
| 33 | chr2 | 85387597  | 85779094  | 391498 | 141  | 1  | 0.05 |
| 34 | chr2 | 108616156 | 108702146 | 85991  | 80   | 0  | 0.06 |
| 35 | chr2 | 113098468 | 113315538 | 217071 | 155  | 1  | 0.05 |
| 36 | chr2 | 207680190 | 207814138 | 133949 | 82   | 0  | 0.06 |
| 37 | chr2 | 218859785 | 218980250 | 120466 | 76   | 1  | 0.10 |
| 38 | chr2 | 238187995 | 238280476 | 92482  | 87   | 0  | 0.06 |
| 39 | chr3 | 49689772  | 50085718  | 395947 | 57   | 85 | 0.02 |
| 40 | chr3 | 69210892  | 69517768  | 306877 | 159  | 2  | 0.05 |
| 41 | chr3 | 71515960  | 71589088  | 73129  | 98   | 0  | 0.05 |
| 42 | chr3 | 72211136  | 72729788  | 518653 | 184  | 0  | 0.05 |
| 43 | chr3 | 87892380  | 88199919  | 307540 | 121  | 3  | 0.07 |
| 44 | chr3 | 113560395 | 113600134 | 39740  | 88   | 0  | 0.05 |
| 45 | chr3 | 128960295 | 129023811 | 63517  | 86   | 1  | 0.07 |
| 46 | chr3 | 153284746 | 153471144 | 186399 | 129  | 1  | 0.05 |
| 47 | chr3 | 161135712 | 161432692 | 296981 | 136  | 1  | 0.05 |
| 48 | chr3 | 170336316 | 171166914 | 830599 | 1980 | 14 | 0.05 |
| 49 | chr3 | 186942362 | 186973656 | 31295  | 127  | 1  | 0.05 |
| 50 | chr3 | 196081484 | 196387889 | 306406 | 129  | 0  | 0.05 |
| 51 | chr3 | 197702394 | 197922897 | 220504 | 114  | 0  | 0.05 |
| 52 | chr4 | 5079279   | 5103783   | 24505  | 81   | 0  | 0.06 |
| 53 | chr4 | 15364657  | 15673597  | 308941 | 139  | 0  | 0.05 |
| 54 | chr4 | 39866405  | 40101424  | 235020 | 116  | 0  | 0.05 |
| 55 | chr4 | 41013073  | 41155501  | 142429 | 83   | 0  | 0.06 |
| 56 | chr4 | 55201663  | 55574188  | 372526 | 190  | 3  | 0.05 |
| 57 | chr4 | 75157719  | 75455306  | 297588 | 116  | 3  | 0.07 |
| 58 | chr4 | 116294501 | 116471157 | 176657 | 114  | 2  | 0.06 |
| 59 | chr4 | 140943953 | 141384697 | 440745 | 163  | 2  | 0.05 |
| 60 | chr4 | 152136121 | 152240866 | 104746 | 85   | 0  | 0.06 |
| 61 | chr4 | 156707576 | 156902598 | 195023 | 120  | 0  | 0.05 |
| 62 | chr5 | 296693    | 460331    | 163639 | 112  | 3  | 0.08 |
| 63 | chr5 | 10446123  | 10724035  | 277913 | 117  | 0  | 0.05 |
| 64 | chr5 | 32198041  | 32267509  | 69469  | 83   | 0  | 0.06 |
| 65 | chr5 | 32648528  | 33013153  | 364626 | 113  | 3  | 0.08 |
| 66 | chr5 | 43020226  | 43208584  | 188359 | 108  | 0  | 0.05 |
| 67 | chr5 | 76026817  | 76190845  | 164029 | 70   | 0  | 0.08 |
| 68 | chr5 | 134707883 | 134804390 | 96508  | 77   | 0  | 0.06 |
| 69 | chr5 | 138543185 | 139104589 | 561405 | 219  | 7  | 0.06 |
| 70 | chr5 | 169625918 | 169752329 | 126412 | 77   | 1  | 0.10 |
| 71 | chr5 | 171467398 | 171573422 | 106025 | 83   | 0  | 0.06 |
| 72 | chr6 | 2580294   | 2810508   | 230215 | 212  | 5  | 0.05 |
| 73 | chr6 | 6597248   | 6772594   | 175347 | 147  | 0  | 0.05 |
| 74 | chr6 | 11421650  | 11520766  | 99117  | 76   | 0  | 0.06 |
| 75 | chr6 | 25134112  | 25193485  | 59374  | 77   | 0  | 0.06 |
| 76 | chr6 | 32375938  | 32825030  | 449093 | 88   | 67 | 0.05 |
| 77 | chr6 | 34347667  | 34476637  | 128971 | 58   | 41 | 0.05 |
| 78 | chr6 | 35105106  | 35128138  | 23033  | 79   | 1  | 0.09 |
| 79 | chr6 | 37243773  | 37269816  | 26044  | 102  | 0  | 0.05 |
| 80 | chr6 | 42082805  | 42125908  | 43104  | 136  | 0  | 0.05 |
| 81 | chr6 | 42642975  | 42897127  | 254153 | 61   | 47 | 0.05 |

|     |       |           |           |        |     |     |      |
|-----|-------|-----------|-----------|--------|-----|-----|------|
| 82  | chr6  | 45452739  | 45585985  | 133247 | 82  | 0   | 0.06 |
| 83  | chr6  | 74210706  | 74547565  | 336860 | 128 | 1   | 0.05 |
| 84  | chr6  | 90941298  | 90998330  | 57033  | 98  | 0   | 0.05 |
| 85  | chr6  | 109717618 | 109751861 | 34244  | 85  | 0   | 0.06 |
| 86  | chr6  | 124154879 | 124276662 | 121784 | 82  | 1   | 0.08 |
| 87  | chr6  | 133061694 | 133189508 | 127815 | 97  | 2   | 0.08 |
| 88  | chr6  | 149394398 | 149650737 | 256340 | 120 | 0   | 0.05 |
| 89  | chr7  | 2613632   | 2746883   | 133252 | 129 | 0   | 0.05 |
| 90  | chr7  | 5423874   | 5642298   | 218425 | 172 | 1   | 0.05 |
| 91  | chr7  | 23341896  | 23497248  | 155353 | 87  | 1   | 0.07 |
| 92  | chr7  | 26538585  | 26711648  | 173064 | 204 | 3   | 0.05 |
| 93  | chr7  | 37348430  | 37692560  | 344131 | 160 | 4   | 0.06 |
| 94  | chr7  | 105458469 | 105507454 | 48986  | 78  | 0   | 0.06 |
| 95  | chr7  | 130305498 | 130398127 | 92630  | 139 | 0   | 0.05 |
| 96  | chr7  | 134481259 | 134559864 | 78606  | 81  | 0   | 0.06 |
| 97  | chr7  | 141819154 | 141899849 | 80696  | 83  | 0   | 0.06 |
| 98  | chr7  | 142092497 | 142112370 | 19874  | 75  | 0   | 0.06 |
| 99  | chr8  | 6361229   | 6592264   | 231036 | 111 | 0   | 0.05 |
| 100 | chr8  | 27237837  | 27318190  | 80354  | 81  | 0   | 0.06 |
| 101 | chr8  | 30366956  | 30446134  | 79179  | 119 | 0   | 0.05 |
| 102 | chr8  | 56846906  | 56997802  | 150897 | 92  | 0   | 0.05 |
| 103 | chr8  | 66998311  | 67085539  | 87229  | 77  | 0   | 0.06 |
| 104 | chr8  | 69027414  | 69145603  | 118190 | 78  | 1   | 0.09 |
| 105 | chr8  | 104101433 | 104287341 | 185909 | 92  | 0   | 0.05 |
| 106 | chr8  | 108369748 | 108431231 | 61484  | 111 | 2   | 0.06 |
| 107 | chr8  | 121032380 | 121165353 | 132974 | 84  | 0   | 0.06 |
| 108 | chr8  | 134065090 | 134225436 | 160347 | 89  | 0   | 0.05 |
| 109 | chr8  | 134537864 | 134650889 | 113026 | 82  | 1   | 0.08 |
| 110 | chr9  | 458618    | 828646    | 370029 | 133 | 1   | 0.05 |
| 111 | chr9  | 5551546   | 5852443   | 300898 | 134 | 1   | 0.05 |
| 112 | chr9  | 6670668   | 6967835   | 297168 | 122 | 0   | 0.05 |
| 113 | chr9  | 20109681  | 20399259  | 289579 | 174 | 0   | 0.05 |
| 114 | chr9  | 70698776  | 70995973  | 297198 | 115 | 3   | 0.07 |
| 115 | chr9  | 74742485  | 75048504  | 306020 | 218 | 2   | 0.05 |
| 116 | chr9  | 78310631  | 78497284  | 186654 | 126 | 1   | 0.05 |
| 117 | chr9  | 99732539  | 99954328  | 221790 | 133 | 0   | 0.05 |
| 118 | chr9  | 123022559 | 123360913 | 338355 | 138 | 4   | 0.09 |
| 119 | chr9  | 124828409 | 124839924 | 11516  | 78  | 0   | 0.06 |
| 120 | chr9  | 127550640 | 127724364 | 173725 | 56  | 34  | 0.05 |
| 121 | chr9  | 131670790 | 131847699 | 176910 | 78  | 35  | 0.05 |
| 122 | chr9  | 138366121 | 138951939 | 585819 | 123 | 118 | 0.02 |
| 123 | chr10 | 3781144   | 4015766   | 234623 | 108 | 0   | 0.05 |
| 124 | chr10 | 6128499   | 6278199   | 149701 | 91  | 0   | 0.05 |
| 125 | chr10 | 11214888  | 11416853  | 201966 | 133 | 0   | 0.05 |
| 126 | chr10 | 17209470  | 17594652  | 385183 | 202 | 3   | 0.05 |
| 127 | chr10 | 30547757  | 31092782  | 545026 | 184 | 1   | 0.05 |
| 128 | chr10 | 49324424  | 49455809  | 131386 | 83  | 1   | 0.08 |
| 129 | chr10 | 63172954  | 63229635  | 56682  | 98  | 0   | 0.05 |
| 130 | chr10 | 73027645  | 73193482  | 165838 | 101 | 0   | 0.05 |
| 131 | chr10 | 80477859  | 80620273  | 142415 | 89  | 0   | 0.05 |
| 132 | chr10 | 101078511 | 101371629 | 293119 | 124 | 0   | 0.05 |
| 133 | chr10 | 105409231 | 105666097 | 256867 | 107 | 0   | 0.05 |
| 134 | chr10 | 116495238 | 116573157 | 77920  | 75  | 0   | 0.06 |
| 135 | chr10 | 130720416 | 130823699 | 103284 | 75  | 0   | 0.06 |
| 136 | chr10 | 133992131 | 134225439 | 233309 | 114 | 1   | 0.05 |
| 137 | chr11 | 3754061   | 3858256   | 104196 | 100 | 1   | 0.06 |

|     |       |           |           |         |     |     |      |
|-----|-------|-----------|-----------|---------|-----|-----|------|
| 138 | chr11 | 9568885   | 9700448   | 131564  | 149 | 1   | 0.05 |
| 139 | chr11 | 10561241  | 10728778  | 167538  | 156 | 4   | 0.06 |
| 140 | chr11 | 33560205  | 33935491  | 375287  | 571 | 1   | 0.05 |
| 141 | chr11 | 62076623  | 62385308  | 308686  | 81  | 53  | 0.05 |
| 142 | chr11 | 64518271  | 65827066  | 1308796 | 273 | 420 | 0.00 |
| 143 | chr11 | 66581788  | 66866076  | 284289  | 37  | 153 | 0.00 |
| 144 | chr11 | 71242981  | 71492970  | 249990  | 69  | 44  | 0.05 |
| 145 | chr11 | 72234484  | 72547013  | 312530  | 55  | 76  | 0.02 |
| 146 | chr11 | 74715586  | 74788727  | 73142   | 77  | 0   | 0.06 |
| 147 | chr11 | 109216250 | 109497229 | 280980  | 119 | 1   | 0.05 |
| 148 | chr11 | 117597557 | 117618933 | 21377   | 87  | 0   | 0.06 |
| 149 | chr11 | 120915260 | 120966572 | 51313   | 76  | 1   | 0.10 |
| 150 | chr11 | 127916781 | 128221466 | 304686  | 250 | 0   | 0.05 |
| 151 | chr12 | 544545    | 706633    | 162089  | 155 | 3   | 0.06 |
| 152 | chr12 | 3848551   | 4270056   | 421506  | 418 | 8   | 0.05 |
| 153 | chr12 | 6418296   | 6884530   | 466235  | 116 | 69  | 0.05 |
| 154 | chr12 | 9985879   | 10102378  | 116500  | 95  | 1   | 0.06 |
| 155 | chr12 | 11589421  | 11942520  | 353100  | 166 | 1   | 0.05 |
| 156 | chr12 | 13069321  | 13300481  | 231161  | 94  | 0   | 0.05 |
| 157 | chr12 | 14993462  | 15269969  | 276508  | 111 | 0   | 0.05 |
| 158 | chr12 | 24837304  | 25099744  | 262441  | 124 | 4   | 0.09 |
| 159 | chr12 | 29145472  | 29331974  | 186503  | 165 | 3   | 0.05 |
| 160 | chr12 | 45133307  | 45341737  | 208431  | 117 | 1   | 0.05 |
| 161 | chr12 | 52052119  | 52298435  | 246317  | 74  | 36  | 0.05 |
| 162 | chr12 | 64502031  | 64645449  | 143419  | 359 | 5   | 0.05 |
| 163 | chr12 | 66996873  | 67150042  | 153170  | 93  | 2   | 0.09 |
| 164 | chr12 | 74128111  | 74164536  | 36426   | 104 | 0   | 0.05 |
| 165 | chr12 | 92649727  | 92766004  | 116278  | 86  | 1   | 0.07 |
| 166 | chr12 | 94963890  | 95140897  | 177008  | 95  | 1   | 0.06 |
| 167 | chr12 | 100645942 | 100903472 | 257531  | 115 | 0   | 0.05 |
| 168 | chr12 | 103394136 | 103691601 | 297466  | 124 | 0   | 0.05 |
| 169 | chr12 | 120499972 | 120634115 | 134144  | 99  | 0   | 0.05 |
| 170 | chr12 | 123904661 | 124106420 | 201760  | 98  | 0   | 0.05 |
| 171 | chr13 | 20449445  | 20611824  | 162380  | 79  | 0   | 0.06 |
| 172 | chr13 | 29778779  | 29949330  | 170552  | 92  | 0   | 0.05 |
| 173 | chr13 | 31502219  | 31590540  | 88322   | 80  | 1   | 0.09 |
| 174 | chr13 | 40025402  | 40152282  | 126881  | 127 | 0   | 0.05 |
| 175 | chr13 | 40452692  | 40532051  | 79360   | 77  | 0   | 0.06 |
| 176 | chr13 | 45525068  | 45683628  | 158561  | 119 | 0   | 0.05 |
| 177 | chr13 | 48991748  | 49171369  | 179622  | 95  | 1   | 0.06 |
| 178 | chr13 | 90585437  | 90739178  | 153742  | 135 | 0   | 0.05 |
| 179 | chr14 | 21947684  | 22001746  | 54063   | 106 | 1   | 0.06 |
| 180 | chr14 | 33454342  | 33616744  | 162403  | 92  | 0   | 0.05 |
| 181 | chr14 | 34753230  | 35024577  | 271348  | 137 | 0   | 0.05 |
| 182 | chr14 | 49502366  | 49653755  | 151390  | 131 | 0   | 0.05 |
| 183 | chr14 | 60822193  | 61025811  | 203619  | 96  | 0   | 0.05 |
| 184 | chr14 | 76450737  | 76635311  | 184575  | 203 | 1   | 0.05 |
| 185 | chr14 | 77107563  | 77143880  | 36318   | 79  | 0   | 0.06 |
| 186 | chr14 | 99586628  | 99773824  | 187197  | 174 | 1   | 0.05 |
| 187 | chr14 | 105356310 | 105679229 | 322920  | 103 | 60  | 0.05 |
| 188 | chr14 | 106148196 | 106348468 | 200273  | 68  | 49  | 0.05 |
| 189 | chr15 | 68523342  | 68655021  | 131680  | 92  | 0   | 0.05 |
| 190 | chr15 | 72773891  | 72951961  | 178071  | 117 | 4   | 0.09 |
| 191 | chr15 | 76111041  | 76211769  | 100729  | 92  | 0   | 0.05 |
| 192 | chr15 | 79102990  | 79402956  | 299967  | 118 | 3   | 0.07 |
| 193 | chr15 | 91152348  | 91228804  | 76457   | 77  | 0   | 0.06 |

|     |       |          |          |        |     |     |      |
|-----|-------|----------|----------|--------|-----|-----|------|
| 194 | chr15 | 99443489 | 99654404 | 210916 | 93  | 1   | 0.06 |
| 195 | chr16 | 1384456  | 1829733  | 445278 | 53  | 117 | 0.01 |
| 196 | chr16 | 10739176 | 11028229 | 289054 | 138 | 0   | 0.05 |
| 197 | chr16 | 12342815 | 12462554 | 119740 | 83  | 1   | 0.08 |
| 198 | chr16 | 16061121 | 16093280 | 32160  | 92  | 1   | 0.06 |
| 199 | chr16 | 17332019 | 17420258 | 88240  | 112 | 0   | 0.05 |
| 200 | chr16 | 23768875 | 23896416 | 127542 | 183 | 3   | 0.05 |
| 201 | chr16 | 29316017 | 29581055 | 265039 | 52  | 43  | 0.05 |
| 202 | chr16 | 30176279 | 30674491 | 498213 | 112 | 61  | 0.06 |
| 203 | chr16 | 56191198 | 56288143 | 96946  | 141 | 3   | 0.07 |
| 204 | chr16 | 66666493 | 66894714 | 228222 | 58  | 34  | 0.05 |
| 205 | chr16 | 68113091 | 68343647 | 230557 | 54  | 43  | 0.05 |
| 206 | chr16 | 73584413 | 73692620 | 108208 | 165 | 2   | 0.05 |
| 207 | chr16 | 80196926 | 80424728 | 227803 | 108 | 1   | 0.05 |
| 208 | chr16 | 87179373 | 87561812 | 382440 | 88  | 50  | 0.05 |
| 209 | chr17 | 1926159  | 1951190  | 25032  | 108 | 0   | 0.05 |
| 210 | chr17 | 1952831  | 2353427  | 400597 | 119 | 57  | 0.05 |
| 211 | chr17 | 4067312  | 4377248  | 309937 | 64  | 69  | 0.02 |
| 212 | chr17 | 7099869  | 7856255  | 756387 | 159 | 136 | 0.02 |
| 213 | chr17 | 22683322 | 22932684 | 249363 | 104 | 1   | 0.06 |
| 214 | chr17 | 37589410 | 37702619 | 113210 | 65  | 41  | 0.05 |
| 215 | chr17 | 37731943 | 37905887 | 173945 | 50  | 58  | 0.03 |
| 216 | chr17 | 43858061 | 44051339 | 193279 | 132 | 1   | 0.05 |
| 217 | chr17 | 50470703 | 50780202 | 309500 | 228 | 6   | 0.05 |
| 218 | chr17 | 52111408 | 52222592 | 111185 | 75  | 0   | 0.06 |
| 219 | chr17 | 52717487 | 52955124 | 237638 | 140 | 0   | 0.05 |
| 220 | chr17 | 55082999 | 55260590 | 177592 | 67  | 33  | 0.05 |
| 221 | chr17 | 59407909 | 59506983 | 99075  | 95  | 0   | 0.05 |
| 222 | chr17 | 60317523 | 60437485 | 119963 | 82  | 1   | 0.08 |
| 223 | chr17 | 70646727 | 71129777 | 483051 | 72  | 83  | 0.02 |
| 224 | chr17 | 71178211 | 71853758 | 675548 | 120 | 152 | 0.01 |
| 225 | chr17 | 72871030 | 73088516 | 217487 | 127 | 4   | 0.09 |
| 226 | chr17 | 73472627 | 74356442 | 883816 | 139 | 153 | 0.00 |
| 227 | chr17 | 76159169 | 76405301 | 246133 | 83  | 63  | 0.05 |
| 228 | chr17 | 77016569 | 77296851 | 280283 | 49  | 72  | 0.02 |
| 229 | chr18 | 2961048  | 3054506  | 93459  | 86  | 1   | 0.07 |
| 230 | chr18 | 3575561  | 3615435  | 39875  | 90  | 0   | 0.05 |
| 231 | chr18 | 5442895  | 5536566  | 93672  | 76  | 1   | 0.10 |
| 232 | chr18 | 9044864  | 9110051  | 65188  | 104 | 0   | 0.05 |
| 233 | chr18 | 13342898 | 13570797 | 227900 | 137 | 0   | 0.05 |
| 234 | chr18 | 27851730 | 27918868 | 67139  | 79  | 0   | 0.06 |
| 235 | chr18 | 40279277 | 40953730 | 674454 | 256 | 4   | 0.05 |
| 236 | chr18 | 44680972 | 44838152 | 157181 | 92  | 0   | 0.05 |
| 237 | chr18 | 50580944 | 50764404 | 183461 | 90  | 1   | 0.07 |
| 238 | chr18 | 58686922 | 59186066 | 499145 | 288 | 1   | 0.05 |
| 239 | chr18 | 66435320 | 66545486 | 110167 | 86  | 1   | 0.07 |
| 240 | chr18 | 72815864 | 73114300 | 298437 | 143 | 0   | 0.05 |
| 241 | chr19 | 1780633  | 2276073  | 495441 | 116 | 70  | 0.04 |
| 242 | chr19 | 3085066  | 3391087  | 306022 | 79  | 42  | 0.05 |
| 243 | chr19 | 6680222  | 6924264  | 244043 | 75  | 47  | 0.05 |
| 244 | chr19 | 11023555 | 11294169 | 270615 | 82  | 34  | 0.06 |
| 245 | chr19 | 13819168 | 14116005 | 296838 | 71  | 35  | 0.06 |
| 246 | chr19 | 17999630 | 18290883 | 291254 | 87  | 34  | 0.05 |
| 247 | chr19 | 46748910 | 46968544 | 219635 | 64  | 36  | 0.05 |
| 248 | chr19 | 49915982 | 50051883 | 135902 | 80  | 0   | 0.06 |
| 249 | chr19 | 53255850 | 53451134 | 195285 | 54  | 39  | 0.05 |

|     |       |          |          |        |     |     |      |
|-----|-------|----------|----------|--------|-----|-----|------|
| 250 | chr19 | 54403103 | 54816529 | 413427 | 42  | 116 | 0.01 |
| 251 | chr20 | 2989441  | 3027697  | 38257  | 97  | 0   | 0.05 |
| 252 | chr20 | 3940678  | 4136761  | 196084 | 107 | 0   | 0.05 |
| 253 | chr20 | 4702765  | 5056651  | 353887 | 141 | 0   | 0.05 |
| 254 | chr20 | 9046782  | 9131818  | 85037  | 139 | 0   | 0.05 |
| 255 | chr20 | 10193114 | 10603639 | 410526 | 258 | 1   | 0.05 |
| 256 | chr20 | 29485582 | 29790241 | 304660 | 139 | 0   | 0.05 |
| 257 | chr20 | 30495975 | 30737922 | 241948 | 154 | 0   | 0.05 |
| 258 | chr20 | 45410863 | 45454525 | 43663  | 132 | 0   | 0.05 |
| 259 | chr20 | 49538925 | 49753392 | 214468 | 107 | 1   | 0.05 |
| 260 | chr20 | 51504428 | 51814692 | 310265 | 267 | 2   | 0.05 |
| 261 | chr20 | 54400321 | 54477456 | 77136  | 105 | 0   | 0.05 |
| 262 | chr20 | 57962815 | 58142080 | 179266 | 94  | 1   | 0.06 |
| 263 | chr21 | 14678853 | 14979736 | 300884 | 121 | 4   | 0.09 |
| 264 | chr21 | 15413268 | 15809085 | 395818 | 336 | 5   | 0.05 |
| 265 | chr21 | 16470691 | 16538073 | 67383  | 102 | 2   | 0.07 |
| 266 | chr21 | 25765945 | 26031880 | 265936 | 132 | 0   | 0.05 |
| 267 | chr21 | 35178167 | 35399650 | 221484 | 102 | 2   | 0.07 |
| 268 | chr21 | 37551482 | 37665869 | 114388 | 75  | 0   | 0.06 |
| 269 | chr21 | 38512931 | 39486285 | 973355 | 415 | 9   | 0.05 |
| 270 | chr21 | 42299833 | 42797769 | 497937 | 256 | 7   | 0.05 |
| 271 | chr21 | 44266853 | 44447893 | 181041 | 65  | 27  | 0.09 |
| 272 | chr21 | 45118862 | 45185070 | 66209  | 114 | 1   | 0.05 |
| 273 | chr22 | 26272999 | 26572395 | 299397 | 187 | 1   | 0.05 |
| 274 | chr22 | 27521880 | 27546796 | 24917  | 151 | 0   | 0.05 |
| 275 | chr22 | 34816457 | 35060989 | 244533 | 124 | 0   | 0.05 |
| 276 | chr22 | 35992535 | 36307153 | 314619 | 133 | 3   | 0.07 |
| 277 | chr22 | 49153607 | 49458277 | 304671 | 56  | 64  | 0.03 |
| 278 | chrX  | 1392807  | 1736242  | 343436 | 117 | 0   | 0.05 |
| 279 | chrX  | 12809147 | 13123394 | 314248 | 117 | 2   | 0.06 |
| 280 | chrY  | 21810424 | 21979675 | 169252 | 83  | 0   | 0.06 |

Table 8: Clumps Discovered Comparing Post-Infusion to WAS  $\gamma$ -Retroviral trial of Braun et al.

## 9 Software Used

This report was prepared with `emacs org-mode`, R, and R packages. Here is some detail about the computing environment.

- R version 3.1.2 (2014-10-31), `x86_64-apple-darwin10.8.0`
- Locale: `C`
- Base packages: `base`, `datasets`, `grDevices`, `graphics`, `methods`, `parallel`, `stats`, `stats4`, `utils`
- Other packages: `BiocGenerics` 0.12.0, `GenomeInfoDb` 1.2.0, `GenomicRanges` 1.18.0, `IRanges` 2.0.0, `S4Vectors` 0.4.0, `cellTypeImputation` 0.1-7, `geneRxCluster` 1.2.0, `knitr` 1.7, `xtable` 1.7-4

- Loaded via a namespace (and not attached): XVector 0.6.0, codetools 0.2-9, digest 0.6.4, evaluate 0.5.5, formatR 1.0, highr 0.4, stringr 0.6.2, tools 3.1.2

## References

- [Berry et al., 2014] Berry, C. C., Ocwieja, K. E., Malani, N., and Bushman, F. D. (2014). Comparing DNA site clusters with Scan Statistics. *Bioinformatics*.
- [Braun et al., 2014] Braun, C. J., Boztug, K., Paruzynski, A., Witzel, M., Schwarzer, A., Rothe, M., Modlich, U., Beier, R., Göhring, G., Steinemann, D., et al. (2014). Gene therapy for wiskott-aldrich syndrome—long-term efficacy and genotoxicity. *Science translational medicine*, 6(227):227ra33–227ra33.
- [Hacein-Bey-Abina et al., 2014] Hacein-Bey-Abina, S., Pai, S.-Y., Gaspar, H. B., Armant, M., Berry, C. C., Blanche, S., Bleesing, J., Blondeau, J., de Boer, H., Buckland, K. F., et al. (2014). A modified  $\gamma$ -retrovirus vector for x-linked severe combined immunodeficiency. *New England Journal of Medicine*, 371(15):1407–1417.
- [Lawrence et al., 2013] Lawrence, M., Huber, W., Pagès, H., Aboyoun, P., Carlson, M., Gentleman, R., Morgan, M. T., and Carey, V. J. (2013). Software for computing and annotating genomic ranges. *PLoS Computational Biology*, 9(8):e1003118.
- [R Core Team, 2013] R Core Team (2013). *R: A Language and Environment for Statistical Computing*. R Foundation for Statistical Computing, Vienna, Austria.

## 10 Appendix - R code

```
### Chunk: unnamed-chunk-1

suppressPackageStartupMessages(
  require(GenomicRanges))
suppressPackageStartupMessages(
  require(geneRxCluster))
suppressPackageStartupMessages(
  require(xtable))
opts_chunk$set(tidy=FALSE,echo=FALSE)

### Chunk: load-was
```

```

print( # print object name
  load(
    print( # print file name
      Sys.glob("data/was.gr*")))
sqllev <- seqlevels(was.gr)
seqinfo(was.gr) <-
  seqinfo(BSgenome.Hsapiens.UCSC.hg18::Hsapiens)[sqllev,]

patient.codes <- c( "pFR03"="Pt4", "pFR01"="Pt2", "pWAS_UK04"="Pt6",
"pWAS_UK02"="Pt1", "pFR04"="Pt5", "pFR02"="Pt3")

was.gr$patient <- patient.codes[was.gr$patient]

### Chunk: move-start

siteID <- paste(seqnames(was.gr),
  start(was.gr),
  strand(was.gr))
pt.pp.unique <-
  !duplicated(cbind(siteID,
                    was.gr$patient,
                    was.gr$infusion))
was.unique <- was.gr[pt.pp.unique,]
## move start to lower site of attack:
was.unique <-
  shift(was.unique,
        as.vector(0L+(strand(was.unique)=="+")*5L))

## order by seqnames, start, and use runif
## to shuffle multiple hits

was.unique.indx <-
  order(as.vector(seqnames(was.unique)),
        as.vector(start(was.unique)),
        runif(length(was.unique)))
was.unique <- was.unique[ was.unique.indx ,]

### Chunk: adjacency-check

start.list <-
  split(start( was.unique ),
        paste0( was.unique$patient,
                was.unique$infusion,
                seqnames(was.unique)))

```

```

diff.list <-
  lapply(start.list,diff)

strand.list <-
  split(strand( was.unique ),
        paste0( was.unique$patient,
                was.unique$infusion,
                seqnames(was.unique)))

strand.pair <-
  lapply(strand.list,
        function(x) paste0( head(x,-1),
                              tail(x,-1)))

### Chunk: table-diff-by-strand

table( pmin(10, unlist(diff.list )),
       unlist( strand.pair ))

### Chunk: cull-1-pp-or-mm

was.split <- split(was.unique,was.unique$patient)

## make a GRangesList of adjacent sites on same strand
contig.same.strand <-
  function(x,strnd)
  {
    this.strand <- strand(x)==strnd
    y <- coverage(x, weight=as.integer(this.strand))
    y.2 <-
      endoapply(y,
                function(z) {
                  runValue(z)[runLength(z)==1] <- 0
                  z})
    y.2.gr <- as(y.2,"GRanges")
    hits <- findOverlaps(x[this.strand,],
                        y.2.gr[ y.2.gr$score>0,])
    split(x[ this.strand,][queryHits(hits),],
          subjectHits(hits))
  }

was.contigs <-

```

```

lapply(was.split,
       function(x) {
         plus <- contig.same.strand(x, strnd="+")
         minus <- contig.same.strand(x, strnd="-")
         c(unnamed(plus), unnamed(minus))
       })

## retain those to be deleted
contig.flag.dels <-
  function(x) {
    cc <- x$clonecount +
      runif(length(x$clonecount))
    bad <- (cc < max(cc)) &
      all(x$infusion==x$infusion[1])
    res <- x[bad,]
    res
  }

bad.contigs <-
  lapply(was.contigs,
        function(y) {
          if (length(y))
            endoapply(y, contig.flag.dels)
          else
            GRanges()
        })

## mark the elements to remove

was.unique.ok <-
  mapply(
    function(x,y) !(x %over% y),
    was.split,
    bad.contigs)

was.no.derep <- unsplit(was.unique.ok, was.unique$patient)

was.derep <- was.unique[was.no.derep,]

### Chunk: inf-per-pt

table(was.derep$patient, was.derep$infusion)

```

```

### Chunk: pt-pt-tab

pp.tab <-
  table(head(was.derep$patient,-1),
        tail(was.derep$patient,-1),
        head(as.vector(seqnames(was.derep)),-1) ==
        tail(as.vector(seqnames(was.derep)),-1))[,,"TRUE"]
pp.tab

### Chunk: test-pp-tab

pp.fit <- loglin( pp.tab, 1:2, fit=TRUE, print = FALSE )$fit
round( pp.fit , 1)

### Chunk: unnamed-chunk-2

round( pp.tab-pp.fit , 1)

### Chunk: chisq

chisq.test( pp.tab )

### Chunk: to-each-his-own

each.own <-
  sapply(sort(unique(was.derep$patient)),
        function(x) {
          gr <- was.derep[was.derep$patient==x,]
          res <-
            gRxCluster(seqnames(gr),start(gr),
                      gr$infusion=="post",
                      kvals=10:50,nperm=100,
                      cutpt.filter.expr=5e6,
                      cutpt.tail.expr=
                      critVal.target(k,n,
                                     target=5/6,
                                     posdiff=x))

          seqinfo(res) <-
            intersect(seqinfo(res),
                     seqinfo(was.derep))

          res
        },simplify=FALSE)

### Chunk: unnamed-chunk-3

```

```

summaryTab <-
  function(x) unlist(gRxSummary(x)[1:2])
  round(t( sapply( each.own, summaryTab )),2)

### Chunk: unify

all.clumps <- each.own[[1]]
for (i in 2:length(each.own))
  if (length(each.own[[i]]))
    all.clumps <-
      suppressWarnings(union( all.clumps,
                              each.own[[i]]))

each.over <-
  sapply(each.own,function(x) all.clumps%over%x)

### Chunk: unnamed-chunk-4

table(rowSums(each.over))

### Chunk: unnamed-chunk-5

clump.tab <-
  function(x) {
    xtabs(~was.derep$infusion +
          was.derep%over%x +
          was.derep$patient)}

all.odds.tab <-
  lapply(seq(along=all.clumps),
         function(x) clump.tab(all.clumps[x,]))

## positive favors post-in-clump
all.odds <-
  sapply(all.odds.tab,
         function(x) apply(x,3,
                           function(y) {
                             y <- y + 0.5
                             sum(log(y)*c(-1,1,1,-1))
                           })))

clump.favor <-
  c("pre", "", "post")[2+sign(t(all.odds))]

```

```

clump.favor[ each.over ] <-
  toupper(clump.favor[ each.over ])
dim(clump.favor) <- dim(each.over)
dimnames(clump.favor) <- dimnames(each.over)

mcols(all.clumps) <- as(clump.favor,"DataFrame")

### Chunk: unnamed-chunk-6

table(PRE=rowSums(clump.favor=="PRE"),
POST=rowSums(clump.favor=="POST"))

### Chunk: show-two-pts-grp

print(as.data.frame(
  mcols(all.clumps))[rowSums(each.over)>1,],
  quote=FALSE)

### Chunk: show-two-pts-loc

all.df <-
  as.data.frame(all.clumps)[rowSums(each.over)>1,1:4]
colnames(all.df)[1] <- "chromo"
all.df

### Chunk: all2gether

all.pt <-
  gRxCluster(seqnames(was.derep),
    start(was.derep),
    was.derep$infusion=="post",
    kvals=10:50)

### Chunk: permutation-over-pt

pp.perms <-
  as.matrix(
    expand.grid(
      rep( list(c("pre","post")), 6)))
colnames(pp.perms) <-
  sort(unique(was.derep$patient))

### Chunk: perm-clumps-by-pt

```

```

perm.call <-
  metadata(all.pt)["call"]

perm.res <- list()
## by symmetry only need first half
for (x in 1:32) {
  perm.grp <-
    was.derep$infusion ==
      pp.perms[x,was.derep$patient]
  perm.res[[x]] <-
    update(perm.call, group=perm.grp)}

### Chunk: fdr-per-pt

perm.targets <-
  unlist(sapply(perm.res,
               function(x) x$target.min))

tm.obs <-
  sort(unique(all.pt$target.min))

perm.vs.all <-
  sapply(tm.obs,
         function(x) sum(perm.targets<=x))

fdr <-
  perm.vs.all/ 32 /
  (1+1:(length(unique(all.pt$target.min))))

fdr <- rev(cummin(rev(fdr)))

fdr.per.clump <-
  fdr[match(all.pt$target.min, tm.obs)]

### Chunk: all-lt-pt-2

gtab <-
  cbind(
    as.data.frame(
      all.pt[ fdr.per.clump < 0.15, ][,c(1,2,3,4,6,7)],
      FDR=round(fdr.per.clump[fdr.per.clump<0.15],3))
  )
gtab$value1 <- as.integer(gtab$value1)
gtab$value2 <- as.integer(gtab$value2)

```

```

colnames(gtab)[1] <- "chromo"
tab <- xtable(gtab)
caption(tab) <- "Clumps Discovered Using All Patients."
print(tab,
      digits=3,
      table.placement="H",
      size="scriptsize"
    )

### Chunk: tab-all-pt-over-singles

table(factor(all.pt[fdr.per.clump<0.15,] %over%
            all.clumps[ rowSums(each.over)>1,],
            c(TRUE,FALSE), c("Over","Not Over")))

### Chunk: tab-single-over-all

table(factor(all.clumps[ rowSums(each.over)>1,] %over%
            all.pt[fdr.per.clump<0.15,],
            c(TRUE,FALSE), c("Over","Not Over")))

### Chunk: read-genes

onco.files <-
  Sys.glob("../data/Oct2013/*onco*RData")
onco.objs <-
  lapply(onco.files,load,env=globalenv())
names(onco.objs) <- sub(".gr","",onco.objs)
onco.labels <- c("LymBody","LymEdge",
                "AllBody","AllEdge")
names(onco.objs) <- onco.labels

### Chunk: each-over

all.2plus <- all.clumps[rowSums(each.over)>1,]
onco.res.each <-
  suppressWarnings(
    sapply(onco.objs,function(y) {
      yg <- (get(y))
      sapply(each.own,function(x) {
        x <- x[x%over%all.2plus,]
        sum(x%over%yg)}}))

onco.res.each

```

```

### Chunk: each-own-perm

eo.call <- metadata(each.own[[1]])$call
eo.call$group <- call("sample",eo.call$group)
eo.call$nperm <- OL

eo.perms <-
  suppressWarnings(
    replicate(50,{
      eo.perm <-
        sapply(
          sort(unique(was.derep$patient)),
          function(x) {
            gr <- was.derep[was.derep$patient==x,]
            res <- eval(eo.call)
            seqinfo(res) <-
              intersect(seqinfo(res),
                seqinfo(was.derep))
            res
          },simplify=FALSE)
      eo.perm <- Filter(length, eo.perm)
      if (length(eo.perm)){
        all.clumps.perm <- eo.perm[[1]]
        for (i in seq(along=eo.perm)[-1])
          if (length(eo.perm[[i]]))
            all.clumps.perm <-
              union( all.clumps.perm,
                eo.perm[[i]])
        each.over.perm <-
          sapply(eo.perm,
            function(x) all.clumps.perm%over%x)
        list(each=eo.perm,clumps=all.clumps.perm,
          over=each.over.perm)}}))

### Chunk: unnamed-chunk-7

perm.over.genes <-
  lapply(eo.perms,
    function(xo) {
      if (!is.null(xo) &&
        any(gt1 <-
          rowSums(as.matrix(xo$over))>1)){
        all.over <- xo$clump[gt1,]
        suppressWarnings(

```

```

sapply(onco.objs,function(y) {
  yg <- (get(y))
  sapply(xo$each,
    function(z) {
      sum(z[z%over%all.over,]%over%yg)}))
} else {
  matrix(c(0,0,0,0),nrow=1)}})

### Chunk: adft

perm.onco.df <-
  cbind(as.data.frame.table(onco.res.each),rep=0)
perm.onco.df$Freq <- 0
for (itab in seq(along=perm.over.genes))
  perm.onco.df <-
  rbind( perm.onco.df,
    if (length(dimnames(perm.over.genes[[itab]])))
      cbind(as.data.frame.table(perm.over.genes[[itab]]),
        rep=itab)
    else
      cbind(as.data.frame.table(onco.res.each*0),rep=itab))
po.tab <- xtabs(Freq~.,perm.onco.df)
exp.onco.res <- apply(po.tab[,,-1],1:2,mean)

onco.res.pvals <- exp.onco.res
onco.res.pvals[] <-
  round(
    p.adjust(1 -
      pchisq((onco.res.each-exp.onco.res)^2/
        (pmax(1,exp.onco.res)),1),"holm"),
    2)
mode(onco.res.pvals) <- "character"
onco.res.pvals[onco.res.pvals=="0"] <- "<0.01"
print(onco.res.pvals,quote=FALSE)

### Chunk: patients-clumps-onco

clump.number <-
  function(x,y)
{
  hit <- findOverlaps(x,y,select="first")
  hit[is.na(hit)] <- 0
  hit}

```

```

## positive favors post-in-clump
log.odds.ratio <-
  function(x)
  {
    z <- colSums(x)+1
    y <- log(x+0.5)
    yc <- log(sweep(x,2,z,function(a,b) b-a))
    y[,1]-y[,2]-yc[,1]+yc[,2]
  }

## return GRanges with odds

pt.odds <-
  function(x,y,z=NULL)
  {
    if (!is.null(z))
      y <- y[y %within% z,]
    tab <-
      table(clump.number(x,y),x$infusion)
    mcols(y)$log.OR <- log.odds.ratio(tab)[-1]
    y
  }

## apply it

pt.log.odds <-
  mapply(pt.odds,
         split(was.derep,was.derep$patient),
         each.own,SIMPLIFY=FALSE)

### Chunk: pt-each-over-genes

density.of.sites <-
  function(x,pt,y){
    expect <-
      table(y$infusion[y$patient==pt]) %o%
      as.numeric(width(x))/
      sum(as.numeric(seqlengths(y)))
    oe.pre <- x$value1/expect['pre',]
    oe.post <- x$value2/expect['post',]
    x$pre.OE <- oe.pre
    x$post.OE <- oe.post
    x}

```

```

pt.log.odds <-
  mapply(density.of.sites,
         pt.log.odds,
         names(pt.log.odds),
         MoreArgs=list(y=was.derep))

pt.smry <-
  lapply(pt.log.odds,
         function(x) {
           for (i.onco in names(onco.objs)){
             onc.gr <- get(onco.objs[[i.onco]])
             mcols(x)[i.onco] <-
               suppressWarnings(
                 countOverlaps(x, onc.gr))
           }
         x})

pt.smry.df <-
  lapply(pt.smry,
         function(x){
           y <- x[ x %within%
                 all.clumps[ rowSums(each.over)>1,],]
           res <-
             as.data.frame(y)[,c(1,2,3,10:16)]
           colnames(res)[1] <- "chromo"
           res
         })

### Chunk: pt-eog-show

require(xtable)
for (i in names(pt.smry.df))
  if (nrow(pt.smry.df[[i]]))
    {
      tab <- xtable(pt.smry.df[[i]])
      caption(tab) <- sub("_", "\\_\\_\\_", i)
      print(tab,
            include.rownames=FALSE,
            digits=3,
            table.placement="H",
            size="tiny"
            )
    }

```

```

### Chunk: all-over-onco

tm.15 <-
  max(all.pt$target.min[fdr.per.clump<0.15])

onco.olaps <-
  suppressWarnings(
    lapply(onco.objs,
           function(x) {
             onco.hit <-
               countOverlaps(
                 all.pt[all.pt$target.min<=tm.15,],
                 get(x))
           })

df <- as.data.frame(onco.olaps)
rownames(df) <- which(all.pt$target.min<=tm.15)

all.pt.odds <-
  pt.odds(was.derep, all.pt[rownames(df),])

seqinfo(all.pt) <- seqinfo(was.derep)

all.pt.expect <-
  table(was.derep$infusion) %>%
  as.numeric(width(all.pt.odds)) /
  sum(as.numeric(seqlengths(all.pt)))

df$log.OR <- all.pt.odds$log.OR
df$pre.OE <- all.pt.odds$value1/all.pt.expect['pre',]
df$post.OE <- all.pt.odds$value2/all.pt.expect['post',]

tab <- xtable(df)
caption(tab) <- "Gene Overlaps for Clumps Discovered Using All Patients"
print(tab,
       digits=3,
       table.placement="H",
       size="tiny"
       )

### Chunk: perm-onc

onco.res.ref <-

```

```

suppressWarnings(
  sapply(onco.objs,function(y) {
    yg <- GIntervalTree(get(y))
    sapply(perm.res,function(x) {
      x <- x[x$target.min<tm.15,]
      sum(x%over%yg)}))})

onco.p.vals <-
  colMeans(onco.res.ref>=
    rep(onco.res.ref[1,],each=nrow(onco.res.ref)))
round(p.adjust(onco.p.vals,method="holm"),3)

### Chunk: unnamed-chunk-8

## Previously the code in these comments was run to produce
## a GRanges object called "braun.gr"

## The file "data/Braun.csv" is the CSV version of the EXCEL
## spreadsheet containing the data supplied by Braun et al.

## NCThg18 <- read.csv("data/Braun.csv")
## braun.df <- NCThg18[,1:13]
## save(braun.df,file="data/braun.df.RData")

## require(GenomicRanges)
## braun.gr <-
##   GRanges(seqnames=braun.df$Chromosome,
##           IRanges(start=braun.df$Integration.Locus,width=1),
##           strand=braun.df$Sequence.Orientation)
## mcols(braun.gr) <- as(braun.df,"DataFrame")
## braun.gr <- sortSeqlevels(braun.gr)
## braun.gr <- sort(braun.gr,ignore.strand=TRUE)
## save(braun.gr,file="data/braun.gr.RData")

require(GenomicRanges)
load("data/braun.gr.RData")

braun.unique <- unlist(unique(split(braun.gr,braun.gr$Patient)))
braun.unique <- sortSeqlevels(braun.unique)
braun.unique <- sort(braun.unique,ignore.strand=TRUE)

### split by patient - add read.counts annotation

braun.counted <-

```

```

mendoapply(function(x,y)
  {z <- countOverlaps(x,y)
   mcols(x)$count <- z
   x},
  splitAsList(braun.unique, braun.unique$Patient),
  splitAsList(braun.gr, braun.gr$Patient))

### - look for adjacent sites in each patient
### - number adjacent sites in order 1, 2, 3 ... by position

.abundUtes <- if (!("abundUtils" %in% search())){
  abundEnv <- attach(NULL, name="abundUtils")
  sys.source("../abundance/src/Utils.R", abundEnv)
}

bus.adj2 <-
  endoapply(braun.counted,
    function(x) {
      ss <- as.vector(paste(seqnames(x), strand(x)))
      st.ss <- split(as.vector(start(x)), ss)
      cid.ss <- sapply(st.ss, cutStart, ht=5)
      cid <- paste(unsplit(cid.ss, ss), ss)
      mcols(x)$cluster <- cid
      mcols(x)$rel.start <-
        ave(start(x), cid, FUN=rank)
      mcols(x)$cl.length <-
        as.numeric(ave(cid, cid, FUN=length))
      mcols(x)$cl.count <-
        ave(as.vector(x$count), cid, FUN=sum)
      x})

br.adj.gr <- unsplit(bus.adj2, braun.unique$Patient)

part1 <- with(as.data.frame(braun.gr, row.names=NULL),
  paste(Patient, seqnames, strand, start))
part2 <- with(as.data.frame(br.adj.gr, row.names=NULL),
  paste(Patient, seqnames, strand, start))
index2 <- match(part1, part2)

new.cols <- setdiff(colnames(mcols(br.adj.gr)),
  colnames(mcols(braun.gr)))

mcols(braun.gr) <-
  cbind(mcols(braun.gr), mcols(br.adj.gr)[index2, new.cols])

```

```

### Chunk: unnamed-chunk-9

table(pmin(20,pmax(-1,diff(start(braun.unique)))),
      paste(head(as.character(strand(braun.unique)),-1),
            tail(as.character(strand(braun.unique)),-1)))[-1,])

### Chunk: do-f-b-b

max.element <-
  function(x){
    if (length(x)==1){
      TRUE
    } else {
      x <- x+runif(length(x));
      x==max(x)}
  }

braun.best <-
  with(as.data.frame(braun.gr),
       ave(Sequence.Count,paste(Patient,cluster),
           FUN=max.element))

braun.cl.start <- start(braun.gr)[braun.best==1]
pt.cluster <- paste(braun.gr$Patient,braun.gr$cluster)

mcols(braun.gr)$best.start <-
  braun.cl.start[match(pt.cluster,
                      pt.cluster[braun.best==1])]

braun.derep <- braun.gr[braun.best==1,]

### Chunk: make-comparisons clumps

braun.sites <- braun.derep
postInfuse <- was.derep[was.derep$infusion=="post",]
mcols(braun.sites) <- NULL
mcols(braun.sites)$trial <- "Braun"
mcols(braun.sites)$patient <- paste("Br",braun.derep$Patient)

pi.patient <- mcols(postInfuse)$patient
mcols(postInfuse) <- NULL
mcols(postInfuse)$trial <- "WAS-lenti"

```

```

mcols(postInfuse)$patient <- pi.patient

br.vs.loc <- c(braun.sites,postInfuse)
br.vs.loc <- sortSeqlevels(br.vs.loc)
br.vs.loc <- sort(br.vs.loc,ignore.strand=TRUE)

bvl.cluster <-
  gRxCluster(seqnames(br.vs.loc),start(br.vs.loc),
             br.vs.loc$trial=="WAS-lenti",
             kvals=c(75L:120L),
             cutpt.filter.expr =
               as.double(apply(x,2,quantile,
                              na.rm=TRUE,probs=0.1)))

n.perms <- 100
pt.all <- unique(br.vs.loc$patient)
n.pt.loc <-
  length(
    unique(br.vs.loc$patient[br.vs.loc$trial=="WAS-lenti"]))
pt.perms <-
  lapply(1:n.perms,
         function(x) {
           br.vs.loc$patient %in% sample(pt.all,n.pt.loc)
         })

perm.call <-
  metadata(bvl.cluster)["call"]
require(parallel)

bvl.perm <-
  mclapply(pt.perms,function(x) update(perm.call, group=x),
           mc.cores=3L)

bvl.perm.targets <-
  unlist(sapply(bvl.perm,
               function(x) x$target.min))

tm.obs <-
  sort(unique(bvl.cluster$target.min))

perm.vs.all <-
  sapply(tm.obs,
         function(x) sum(bvl.perm.targets<=x))
r.discover <- table(factor(bvl.cluster$target.min,tm.obs))

```

```

bvl.fdr <-
  perm.vs.all/ n.perms /
  (1+cumsum(r.discover))

bvl.fdr <- rev(cummin(rev(bvl.fdr)))

bvl.fdr.per.clump <-
  bvl.fdr[match(bvl.cluster$target.min, tm.obs)]

### Chunk: unnamed-chunk-10

ntab <- xtabs(~trial,as.data.frame(br.vs.loc))
ntab

### Chunk: unnamed-chunk-11

lenti.favor <-
  sign(ntab[1]*bvl.cluster$value2>ntab[2]*bvl.cluster$value1)
lentab <- table(lenti.favor)

### Chunk: braun-vs-local-list

bgtab <-
  cbind(
    as.data.frame(
      bvl.cluster)[,c(1,2,3,4,6,7)],
    FDR= round(bvl.fdr.per.clump,4))
bgtab$value1 <- as.integer(bgtab$value1)
bgtab$value2 <- as.integer(bgtab$value2)
colnames(bgtab)[c(1,5,6)] <- c("chromo", "Braun", "WAS-Lenti")
tab <- xtable(bgtab)
caption(tab) <-
  paste("Clumps Discovered Comparing Post-Infusion to ",
        "WAS $\gamma$-Retroviral trial of Braun et al.")

bad.genes.gr <-
  GRanges(seqnames=c("chr11","chr12","chr3"),
          IRanges(start =
            c(33560205, 3848551, 170336316),
            end =
            c(33935491, 4270056, 171166914)
          ),strand=rep("*",3),
          gene=c("LMO2","CCND2","MECOM/EVI1"))

```

```

addrow <-
  list( pos=as.list( which( bvl.cluster %over% bad.genes.gr) - 1),
        command=rep("\\rowcolor{yellow} ",3))
print(tab,
      digits=4,
      add.to.row=addrow,
      tabular.environment="longtable",
      floating=FALSE,
      size="scriptsize"
    )

### Chunk: sessioninf

toLatex(sessionInfo())

### Chunk: print-all-code

codelines <-
  knitr::knit_code$get()

cat("\\begin{knitrou}
\\definecolor{shadecolor}{rgb}{0.969, 0.969, 0.969}
\\color{fgcolor}
\\begin{kframe}
\\begin{alltt}\\n")

## highr NAMESPACE is guaranteed by knitr

for (i in names(codelines)){
  cat("",
      highr::hi_latex(paste0("### Chunk: ",i)),
      "",
      highr::hi_latex(codelines[[i]]),
      sep="\\n")
}

### show utils not echo-ed in any chunk
cat(highr::hi_latex(
  "\\n### Abundance Utils code read by sys.source:\\n"),
  highr::hi_latex(
    readLines("../..abundance/src/utils.R")),
  sep="\\n")

cat("\\n\\end{alltt}\\n\\end{kframe}\\n\\end{knitrou}\\n")

```

```

### Abundance Utils code read by sys.source:
##' add together tables
##'
##' numeric names of table elements are used to combine
##' the tables --- summing counts of like labelled
##' cells and appending novel cells
##' @title reduce.tabs
##' @param x a table of counts with
##' \code{all(!is.na(as.numeric(names(x))))}
##' @param y a table like \code{x}
##' @return table
##' @author Charles Berry
reduce.tabs <-
  function(x,y){
    inx <- intersect(names(x),names(y))
    onlyy <- setdiff(names(y),names(x))
    x[inx] <-x[inx] + y[inx]
    if (length(onlyy)){
      x[as.numeric(onlyy)] <- y[onlyy]
      names(x) <- 1:length(x)
      x[is.na(x)] <- 0
    }
    x}

##' dist class from lower.tri vector
##'
##' find dimensions, fill matrix, and coerce
##' @title as.DistanceVector
##' @param x
##' @return dist object
##' @author Charles Berry
as.distVector <- function(x)
{
  lx <- length(x)
  ly <- (1+sqrt(1+8*lx))/2
  res <- array(0,c(ly,ly))
  res[lower.tri(res)] <- x
  ## not needed with as.dist wrapper
  ##   res <- res+t(res)
  as.dist(res)}

euc1 <- function(x) sqrt(rowSums(x^2))
euc2 <-
  function(x) pmin(12,sqrt((x^2) %*% c(1,4,64)))

```

```

minlen <-
  function(x) do.call(pmin,as.data.frame(x))

##' ##' weighted Manhattan distance
##'
##' \code{ID + length + 8*rep}
##' @title manhat
##' @param x matrix of distances
##' @return distance
##' @author Charles Berry
manhat <- function(x) x%*%c(1,1,8)

##' hierarchical clustering of distance
##'
##' combine various distnce metrics and do hclust
##' @title hcID
##' @param x a matrix of distances
##' @param ht height at which to cut
##' @param distfun how to combine distances to scalar
##' @return hclust object with cut component
##' categorizing the leaves after cutting
##' @author Charles Berry
hcID <-
  function(x,ht=5,distfun=manhat)
  {
    dists <- as.distVector(distfun(x))
    hc <- hclust(dists)
    hc$cut <- cutree(hc,h=ht)
    hc
  }

##' Figure the cluster IDs for length and ID separately
##'
##'
##' @title hcEach
##' @param x result of distFuns
##' @param ht
##' @return
##' @author Charles Berry
hcEach <-
  function(x,ht=3){
    hcID <-
      hclust(as.distVector(x[, "ID"]))

```

```

hclLength <-
  hclust(as.distVector(x[, "length"]))
cutID <- cutree(hclID, h=ht)
cutLength <- cutree(hclLength, h=ht)
cbind(ID=cutID, length=cutLength)}

## hcEach(g3.dists[[1]])

##' inspect distance subsets
##'
##'
##' @title splitDist
##' @param xforest
##' @param xsplit
##' @param n
##' @param m
##' @return
##' @author Charles Berry
splitDist <-
function(xforest, xsplit, n, m)
{
  distsmry <-
    sapply(xforest,
           function(x) c(n=length(x$cut),
                        m=length(unique(x$cut))))
  dsFlag <- distsmry["n",] %in% n & distsmry["m",] %in% m
  index <- colnames(distsmry)[ dsFlag ]
  index.length <- sapply(xsplit[index], length)
  counts <- as.vector(unlist(xsplit[index])$count)
  cuts <- unlist(lapply(xforest[index], "[[", "cut"),
                 use.names=FALSE)
  tab <-
    xtabs(counts~.,
          list(site=rep(index, index.length), count=cuts))
  df <-
    cbind(
      as.data.frame(
        unlist(xsplit[index]),
        row.names=NULL)[, -(3:5)],
        cut=cuts)
    list(table=tab, data.frame=df)
}

##' summarize the distances by tabling them

```

```

##'
##'
##' @title distSmry
##' @param xdists list of distance matrices
##' @param IDFun function to get distance factor
##' @param lenFun function to get distance factor
##' @param repFun function to get distance factor
##' @return list of lists of tables
##' @author Charles Berry
distSmry <-
  function(xdists,
           IDFun=function(x) factor(pmin(12,x),0:12),
           lenFun=function(x) factor(pmin(10,x),0:10),
           repFun=function(x) factor(x,0:4))
    lapply(xdists, function(x)
      list( ID=table(IDFun(x[, "ID"])),
            length=table(lenFun(x[, "length"])),
            rep=table(repFun(x[, "rep"]))))

##' sum tables of distances
##'
##' use this for Reduce
##' @title distsmry.redFun
##' @param x
##' @param y
##' @return
##' @author Charles Berry
distsmry.redFun <-
  function(x,y) list(
    ID=x$ID+y$ID,
    length=x$length+y$length,
    rep=x$rep+y$rep)

##' widths of clumps of values
##'
##' Note that clump is the number of the clump
##' of contiguous sites. clump==0 is assigned to
##' vacant positions
##' @title bleed.table
##' @param x integer vector
##' @return frequency table for clump widths
##' @author Charles Berry
bleed.table <-
  function(x){

```

```

rv <- runValue(coverage(IRanges(start=x,width=1)))
clump <- cumsum(rv==0)*(rv!=0)
table(table(clump)[-1])}

distFuns <-
  function(x) cbind(length=dist(as.vector(x$length)),
                    ID=stringDist(x$FASTA),
                    rep=dist(as.vector(x$rep)))

##' do \code{cutree(hclust(x),h)} smartly when x is
##' long, but \code{unique(x)} is short
##'
##' In this case, i.e. x is a vector with no dim
##' attribute
##' \code{cutree(hclust(dist(x)),h)[!duplicated(x)]}
##' equals
##' \code{cutree(hclust(dist(x[!duplicated(x)]),h))}. The
##' function tries be more efficient than the brute
##' force clustering by working on a smaller \code{x}
##'
##' @title cutStart
##' @param x - numeric vector
##' @param ht h cutpoint for cutree
##' @return see \code{cutree}
##' @author Charles Berry
cutStart <-
  function(x,ht=5)
  {
    cutBig <-
      function(x,height) {
        x.uniq <- unique(x)
        len.uniq <- length(x.uniq)
        if (len.uniq==1)
          return(rep(1L,length(x)))
        x.ind <- match(x,x.uniq)
        cutree(hclust(dist(x.uniq)),h=height)[x.ind]
      }
    lencat <- findInterval(length(x),c(1,2,100))
    switch(lencat,
          ## singleton
          1L,
          ## small tuple
          cutree(hclust(dist(x)),h=ht),
          ## larger tuple

```

```

        cutBig(x,ht)
    )
}

##' smarter \code{cutree(hclust(stringDist(x)),h=5)}
##'
##' See the details for \code{cutStart}
##' @title cutID
##' @param x FASTA
##' @param ht h cutpoint for cutree
##' @return cluster IDs
##' @author Charles Berry
cutID <-
  function(x,ht=5)
  {
    cutBig <-
      function(x,height) {
        x.uniq <- unique(x)
        if (length(x.uniq)==1) return(1L)
        x.ind <- match(x,x.uniq)
        cutree(hclust(stringDist(x.uniq)),h=height)[x.ind]
      }
    lencat <- findInterval(length(x),c(1,2,100))
    switch(lencat,
      ## singleton
      1L,
      ## small tuple
      cutree(hclust(stringDist(x)),h=ht),
      ## larger tuple
      cutBig(x,ht)
    )
  }

##' first word of each element
##'
##' the leading nonblank characters are returned
##' @title first.word
##' @param x character vector
##' @return character vector
##' @author Charles Berry
first.word <-
  function(x) sub("[ ].*","",x)

```
